# Supplementary material for: Dispersible composites of exfoliated graphite and polyaniline with improved electrochemical behaviour for solid-state chemical sensor applications
Source: Royal Society of Chemistry journal article supplement (doi:10.1039/c4ra08362h), 2014-01-01
Supplement: c4ra08362h1.pdf [file c4ra08362h1.pdf]

## Supporting information

Dispersible composites of exfoliated graphite and polyaniline with improved electrochemical behaviour for solid-state chemical sensor applications

*Zhanna A. Boeva<sup>1,2,\*</sup>, Konstantin A. Milakin<sup>2</sup>, Markus Pesonen<sup>3</sup>, Aleksander N. Ozerin<sup>4</sup>, Vladimir G. Sergeyev<sup>2</sup> and Tom Lindfors<sup>1,\*</sup>*

<sup>1</sup> Åbo Akademi University, Process Chemistry Centre, Department of Chemical Engineering, Laboratory of Analytical Chemistry, Biskopsgatan 8, FI-20500 Turku/Åbo, Finland

<sup>2</sup> M.V. Lomonosov Moscow State University, Polymer Division, Chemistry Department, Leninskie gory 1, build. 3, Moscow, Russian Federation

<sup>3</sup> Åbo Akademi University, Department of Natural Sciences and Center for Functional Materials, Physics, Porthansgatan 3, FI-20500 Turku/Åbo, Finland

<sup>4</sup> Russian Academy of Sciences, Institute of Synthetic Polymeric Materials, 70, Profsoyuznaya street, Moscow, Russian Federation.

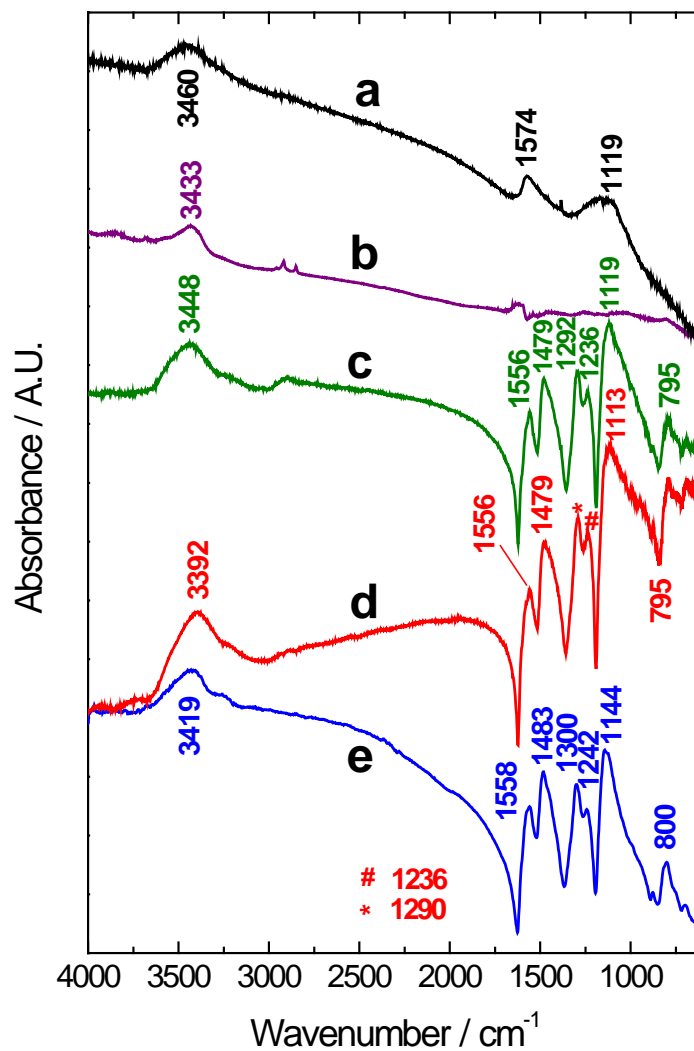

**Fig. S1.** The FTIR-spectra of (a) graphene (< 3 monolayers), (b) exfoliated graphite (30-50 monolayers) (c) neat PANI(ES), (d) PANI(ES)-graphene and (e) PANI(ES)-graphite.

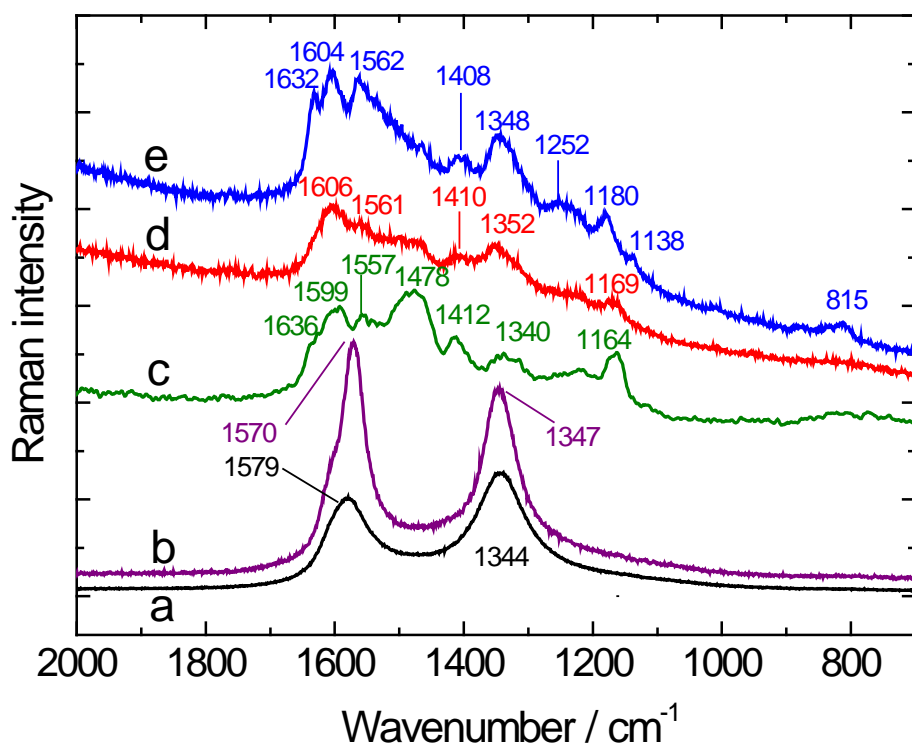

**Fig. S2.** Raman spectra of (a) graphene (< 3 monolayers), (b) exfoliated graphite (30-50 monolayers), (c) neat PANI(EB) and (d) PANI(EB)-graphene and (e) the PANI(EB)-graphite composites;  $\lambda_{\text{exc}}$ : 514 nm.

**Table S1.** Assignments and wavenumbers of the main Raman bands of graphene, graphite, PANI(EB), PANI(EB)-graphene and PANI(EB)-graphite. The benzoid, quinoid and semiquinone radical units are denoted by B, Q and SQR, respectively.

| <i>Graphene</i>     | <i>Graphite</i>     | <i>PANI(EB)</i>     | <i>PANI(EB)-<br/>graphene</i> | <i>PANI(EB)-<br/>graphite</i> | <i>Assignments</i>                                         | <i>Ref.</i> |
|---------------------|---------------------|---------------------|-------------------------------|-------------------------------|------------------------------------------------------------|-------------|
| (cm <sup>-1</sup> ) | (cm <sup>-1</sup> ) | (cm <sup>-1</sup> ) | (cm <sup>-1</sup> )           | (cm <sup>-1</sup> )           |                                                            |             |
| -                   | -                   | -                   | -                             | 815                           | Ring symmetric stretching;<br>amine deformation            | 3           |
| -                   | -                   | -                   | -                             | 1138                          | C-H in-plane bending (Q)                                   | 1, 3        |
| -                   | -                   | 1164                | 1169                          | 1180                          | C-H in-plane bending (B)                                   | 1, 3        |
| -                   | -                   | -                   | -                             | 1252                          | C-N <sup>+</sup> stretching (SQR)                          | 1-3         |
| 1344                | 1347                | -                   | -                             | -                             | D-band (defect zones)                                      | 4           |
| -                   | -                   | 1340                | 1352                          | 1348                          | C-N <sup>+</sup> stretching (SQR)                          | 1, 5        |
| -                   | -                   | 1412                | 1410                          | 1408                          | C-C stretching (Q)                                         | 3           |
| -                   | -                   | 1478                | 1473                          | -                             | C=N and CH=CH<br>stretching (Q)                            | 1-3, 6      |
| -                   | -                   | 1557                | 1561                          | 1562                          | C-C stretching                                             | 3, 6        |
| 1579                | 1570                | -                   | -                             | -                             | G-band (doubly<br>degenerate zone centre $E_{2g}$<br>mode) | 4           |
| -                   | -                   | 1599                | 1606                          | 1604                          | C=C stretching (Q)                                         | 1,3         |
| -                   | -                   | 1636                | -                             | 1632                          | C-C stretching (B)                                         | 1-3         |

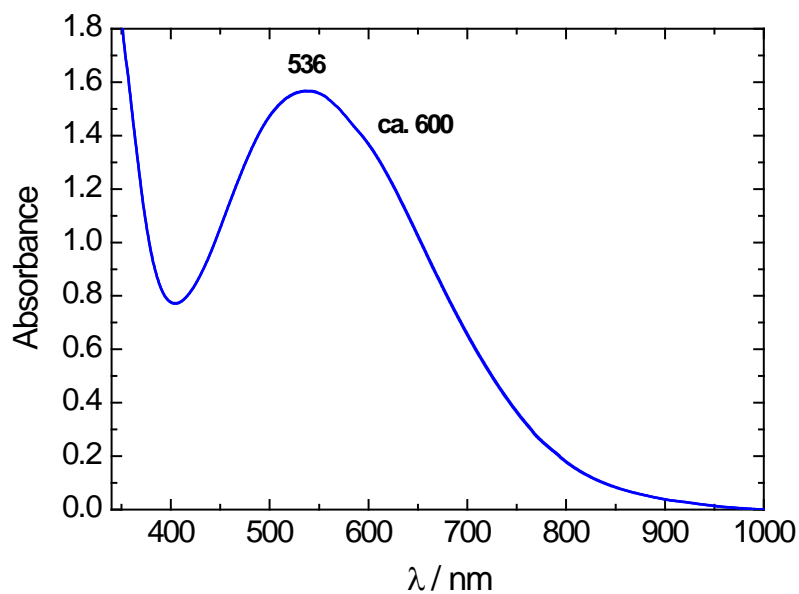

**Fig. S3.** UV-vis spectra of the PANI-graphite film measured at equilibrium at pH=7.8 and 9.5. The two spectra are overlapping. The composite film was casted onto the tin oxide glass substrate which was coated with a 10 nm thick Pt layer. The pH of the supporting electrolyte (0.1 M NaCl) was adjusting with NaOH either to pH=7.8 or 9.5 and measured with a pH electrode before and after the UV-vis measurement (ca. 1 min).

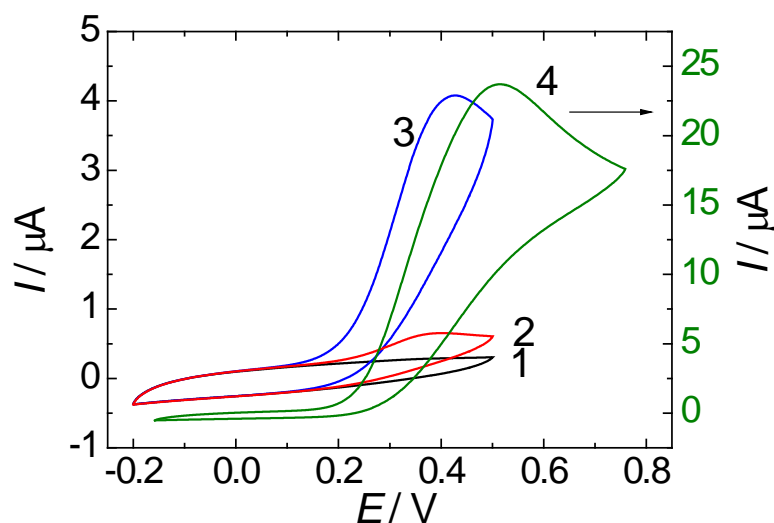

**Fig. S4.** Cyclic voltammograms of (1)  $10^{-5}$  M, (2)  $10^{-4}$  M, (3)  $10^{-3}$  M and (4)  $10^{-2}$  M ascorbic acid measured with glassy carbon as the working electrode; Reference electrode: Ag/AgCl/3 M KCl,  $v=50 \text{ mV s}^{-1}$ .

## References

- [1] M. Bartonek, N. S. Sariciftci and H. Kuzmany, *Synth. Met.*, 1990, **36**, 83.
- [2] J. Laska, *Synth. Met.*, 2002, **129**, 229.
- [3] K. Berrada, S. Quillard, G. Louarn and S. Lefrant, *Synth. Met.*, 1995, **69**, 201.
- [4] F. Tuinstra and J. L. Koenig, *J. Chem. Phys.*, 1970, **53**, 1126.
- [5] J. Laska, R. Girault, S. Quillard, G. Louarn, A. Pron and S. Lefrant, *Synth. Met.*, 1995, **75**, 69.
- [6] Y. Furukawa, F. Ueda, Y. Hyodo, I. Harada, T. Nakajima and T. Kawagoe, *Macromolecules*, 1988, **21**, 1297.
